# Supplementary material
Source: PubMed Central journal article supplement (PMC5613880)
Supplement: DS_10.1177_0022034517719870.pdf [file DS_10.1177_0022034517719870.pdf]

## IRF6 and SPRY4 Signaling Interact in Periderm Development

Y.A. Kousa, R. Roushangar, N. Patel, A. Walter, P. Marangoni, R. Krumlauf, O.D. Klein, and B.C. Schutte

### Appendix

|                                                                | <b>E13.5</b> | <b>E15.5 -E16.5</b> | <b>E17.5</b> | <b>Total</b> |
|----------------------------------------------------------------|--------------|---------------------|--------------|--------------|
| <b>Litters</b>                                                 | 4            | 4                   | 9            | 17           |
| <i>Irf6</i> <sup>+/+</sup>                                     | 3            | 9                   | 18           | 30           |
| <i>Irf6</i> <sup>+/-</sup>                                     | 5            | 9                   | 22           | 36           |
| <i>Tg</i> <sup>KRT14::Spry4</sup>                              | 8            | 7                   | 19           | 34           |
| <i>Irf6</i> <sup>+/-</sup> ; <i>Tg</i> <sup>KRT14::Spry4</sup> | 17           | 9                   | 21           | 47           |
| <b>Resorbing</b>                                               | 3            | 3                   | 2            | 8            |
| <b>Total</b>                                                   | 36           | 37                  | 82           | 155          |
| <b>P-value</b>                                                 | 0.8          | 0.66                | 0.7          | 0.65         |

**Appendix Table.** Mice heterozygous for the *Irf6* genetrap allele (*Irf6*<sup>+/<sup>gt</sup></sup>, referred to as *Irf6*<sup>+/-</sup>) were crossed with mice carrying the *Tg*<sup>KRT14::Spry4</sup> transgene (over-expressing *Spry4* under the control of the *KRT14* promoter). All desired genotypes were generated from this cross. We generated embryos at three timepoints, including E13.5, E15.5-E16.5 and E17.5. The genotype distribution of these embryos was not statistically different from the number of expected embryos based on the observed totals (P-value ranging from 0.65 to 0.8). The number of resorbing embryos was not statistically significant (P-value = 0.28) based on an expected resorbtion rate of 1-3% in C57Bl6 mice.
